# Supplementary material for: A new genus for the eastern dwarf galagos (Primates: Galagidae)
Source: Oxford University Press journal article supplement (doi:10.1093/zoolinnean/zlw028), 2017-02-08
Supplement: zlw028_suppl_Supplementary_Information_Table_1.docx [file zlw028_suppl_Supplementary_Information_Table_1.docx]

**Supplementary Information**

**Table 1. Eastern dwarfspecimens included in the morphometric analysis of skulls**

| **Accession number** | **Genus** | **Species** | **Subspecies** |  |
| --- | --- | --- | --- | --- |
| FMNH 177220 | *Galagoides* | *granti* |  |  |
| NHM 6.11.8.5 | *Galagoides* | *granti* |  | Paratype |
| NHM 6.11.8.6 | *Galagoides* | *granti* |  | Paratype |
| NHM 6.11.8.7 | *Galagoides* | *granti* |  | Type |
| NHM 6.11.8.9 | *Galagoides* | *granti* |  | Paratype |
| NHM 6.11.8.10 | *Galagoides* | *granti* |  | Paratype |
| NHM 8.1.1.12 | *Galagoides* | *granti* |  |  |
| NHM 8.1.1.13 | *Galagoides* | *granti* |  |  |
| NHM 8.1.1.15 | *Galagoides* | *granti* |  |  |
| NHM 8.1.1.16 | *Galagoides* | *granti* |  |  |
| NHM 8.1.1.129 | *Galagoides* | *granti* |  |  |
| NHM 94.1.25.22 | *Galagoides* | *granti* |  | Paratype |
| NMZ 28344 | *Galagoides* | *granti* |  |  |
| NMZ 67333 | *Galagoides* | *granti* |  |  |
| NMZ 67340 | *Galagoides* | *granti* |  |  |
| NMZ 67341 | *Galagoides* | *granti* |  |  |
| NMZ 67342 | *Galagoides* | *granti* |  |  |
| NMZ 67344 | *Galagoides* | *granti* |  |  |
| NMZ 67346 | *Galagoides* | *granti* |  |  |
| NMZ 67347 | *Galagoides* | *granti* |  |  |
| NMZ 67349 | *Galagoides* | *granti* |  |  |
| NMZ 67353 | *Galagoides* | *granti* |  |  |
| NMZ 67354 | *Galagoides* | *granti* |  |  |
| NMZ 67355 | *Galagoides* | *granti* |  |  |
| NMZ 67357 | *Galagoides* | *granti* |  |  |
| NMZ 67358 | *Galagoides* | *granti* |  |  |
| NMZ 67359 | *Galagoides* | *granti* |  |  |
| NMZ 67361 | *Galagoides* | *granti* |  |  |
| NMZ 67362 | *Galagoides* | *granti* |  |  |
| USNM 352253 | *Galagoides* | *granti* |  |  |
| USNM 352254 | *Galagoides* | *granti* |  |  |
| USNM 181810 | *Galago* | *moholi* | *cocos* | Type |
| MCZ 22453 | *Galagoides* | *orinus* |  | Type |
| NHM 54.748 | *Galagoides* | *orinus* |  |  |
| NHM 54.747 | *Galagoides* | *orinus* |  |  |
| SFR 83201 | *Galagoides* | *orinus* |  |  |
| MCZ 38875 | *Galagoides* | *rondoensis* |  |  |
| SFR 94901 | *Galagoides* | *rondoensis* |  |  |
| ZMB 8903 | *Galagoides* | *rondoensis* |  |  |
| ZMB 9130 | *Galagoides* | *rondoensis* |  |  |
| ZMB 9131 | *Galagoides* | *rondoensis* |  |  |
| NHM 64.1970 | *Galagoides* | *rondoensis* |  | Type |
| NHM 1995.251 | *Galagoides* | *udzungwensis* |  | Type |
| MCZ 26446 | *Galagoides* | *zanzibaricus* |  |  |
| MCZ 26449 | *Galagoides* | *zanizibaricus* |  |  |
| MCZ 26451 | *Galagoides* | *zanzibaricus* |  |  |
| ZMB 64201 | *Galagoides* | *zanzibaricus* |  | Type |
| AMNH 187362 | *Galagoides* | *zanzibaricus* | *cocos* |  |
| CMNH 57948 | *Galagoides* | *zanzibaricus* | *cocos* |  |
| CMNH 98107 | *Galagoides* | *zanzibaricus* | *cocos* |  |
| CMNH 98108 | *Galagoides* | *zanzibaricus* |  |  |
| MCZ 22449 | *Galagoides* | *zanzibaricus* |  |  |
| MCZ 22450 | *Galagoides* | *zanzibaricus* |  |  |
| MCZ 38911 | *Galagoides* | *zanzibaricus* |  |  |
| MCZ 38912 | *Galagoides* | *zanzibaricus* |  |  |
| MCZ 38915 | *Galagoides* | *zanzibaricus* |  |  |
| NMK DM 4533 | *Galagoides* | *zanzibaricus* | *cocos* |  |
| NMK DM 4537 | *Galagoides* | *zanzibaricus* | *cocos* |  |
| NMK DM 4547 | *Galagoides* | *zanzibaricus* | *cocos* |  |
| NHM 55.330 | *Galagoides* | *zanzibaricus* |  |  |
| NHM 64.972 | *Galagoides* | *zanzibaricus* |  |  |
| NHM 64.974 | *Galagoides* | *zanzibaricus* |  |  |
| NHM 64.975 | *Galagoides* | *zanzibaricus* |  |  |
| NHM 64.976 | *Galagoides* | *zanzibaricus* |  |  |
| NHM 64.977 | *Galagoides* | *zanzibaricus* |  |  |
| NHM 64.978 | *Galagoides* | *zanzibaricus* |  |  |
| NHM 64.979 | *Galagoides* | *zanzibaricus* |  |  |
| NHM 64.980 | *Galagoides* | *zanzibaricus* |  |  |
| NHM 20.6.10.2 | *Galagoides* | *zanzibaricus* |  |  |
| NHM 20.6.10.3 | *Galagoides* | *zanzibaricus* |  |  |
| NHM 54.738 | *Galagoides* | *zanzibaricus* |  |  |
| NHM 54.739 | *Galagoides* | *zanzibaricus* |  |  |
| NHM 54.740 | *Galagoides* | *zanzibaricus* |  |  |
| TM 45930 | *Galagoides* | *zanzibaricus* |  |  |
| USNM 184218 | *Galagoides* | *zanzibaricus* | *cocos* |  |
| USNM 184220 | *Galagoides* | *zanzibaricus* | *cocos* |  |
| USNM 184221 | *Galagoides* | *zanzibaricus* | *cocos* |  |
| USNM 184222 | *Galagoides* | *zanzibaricus* | *cocos* |  |
| USNM 184224 | *Galagoides* | *zanzibaricus* | *cocos* |  |
| USNM 241579 | *Galagoides* | *zanzibaricus* |  |  |

**Key to museums:**

**AMNH: American Museum of Natural History, New York, USA**

**CMNH: Carnegie Museum of Natural History, Pittsburgh, USA**

**FMNH: Field Museum of Natural History, Chicago, USA**

**MCZ: Museum of Comparative Zoology, Harvard Museum of Natural History, Cambridge MA, USA**

**NHM: Natural History Museum, London, UK**

**NMK: National Museum of Kenya, Nairobi, Kenya**

**NMZ: National Museum of Natural History, Bulawayo, Zimbabwe**

**SFR: Senckenberg Museum of Natural History, Frankfurt, Germany**

**TM: Ditsong Museum of Natural History (Transvaal Museum), Pretoria, South Africa**

**USNM: United States National Museum of Natural History (Smithsonian Institution), Washington DC, USA**

**ZMB: Museum of Natural History, Berlin, Germany**
